# Supplementary material
Source: Springer Nature journal article supplement (https://www.springermedizin.de/resource/supplementary/12889_2005_417_MOESM3_ESM.pdf/9500818)

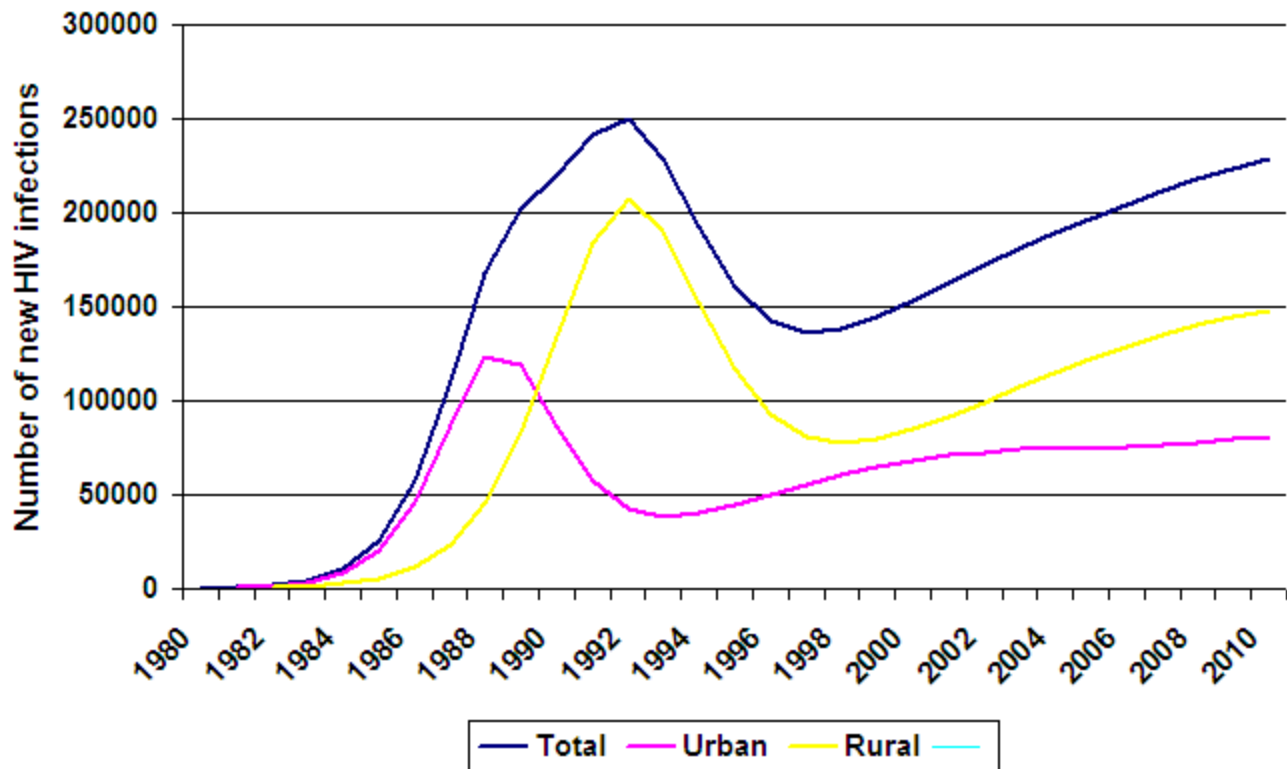

Supplement: MOESM3 [file 9500818]
